# Supplementary material
Source: Elsevier journal article supplement (https://www.sciencedirect.com/science/article/pii/S0014256520301806)
Supplement: mmc1 [file S0014256520301806:mmc1.pdf]

## Encuesta:

1. Edad
2. Sexo
3. MIR (MIR 1,2,3,4,5)
4. FEA (años de ejercicio)
5. Lugar de trabajo:
  - a. Hospital < 200 camas
  - b. Hospital entre 200 y 500 camas
  - c. Hospital entre 500 y 1000 camas
  - d. Hospital > de 1000 camas
6. Área de dedicación preferente: hospitalización / consultas externas / interconsultas.
7. Consulta Monográfica: DM2, Riesgo vascular, Obesidad
8. ¿Tienes un peso/Báscula en tu consulta?
9. ¿Tienes un tallímetro en tu consulta?
10. ¿Tienes una cinta métrica no extensible en tu consulta?
11. Pesas a tu paciente en la consulta:
  - a. Siempre
  - b. La mayor parte de las veces
  - c. Casi siempre
  - d. Casi nunca
  - e. Nunca

12. Calculas el IMC a tu paciente en la consulta:

- a. Siempre
- b. La mayor parte de las veces
- c. Casi siempre
- d. Casi nunca
- e. Nunca

13. Mides el perímetro abdominal a tu paciente en la consulta:

- a. Siempre
- b. La mayor parte de las veces
- c. Casi siempre
- d. Casi nunca
- e. Nunca

14. ¿Recoges en la Historia clínica de tu paciente los datos antropométricos?

15. ¿Recoges entre los diagnósticos la Obesidad?

16. En caso afirmativo, ¿clasificas la Obesidad en grados según la OMS?

17. ¿Dispones de peso en la planta de hospitalización?

18. ¿Se pesan habitualmente a los pacientes hospitalizados en tu servicio?

19. Cuando diagnosticas a un paciente como Obeso, normalmente:

- a. No hago nada
- b. Le doy al paciente indicaciones sobre modificación de los hábitos alimentarios
- c. Le doy al paciente una dieta estándar si dispongo de ella en la consulta
- d. Envío al paciente a un Dietista/Nutricionista
- e. Envío al paciente al Endocrino

20. Cuándo diagnosticas a un paciente como Obeso, normalmente:

- a. Descartas otras comorbilidades asociadas a la obesidad (SI/NO)
- b. En caso afirmativo, descartas:
  - i. Síndrome de hipoventilación asociado a Obesidad
  - ii. Esteatohepatitis no alcohólica
  - iii. Diabetes Mellitus tipo 2
  - iv. Hipogonadismo
  - v. Enfermedad cardiovascular
  - vi. Enfermedad renal crónica. Albuminuria
  - vii. Síndrome depresivo

21. ¿Incluyes el IMC de los pacientes en el informe de alta?

22. ¿incluyes los diagnósticos de Sobrepeso / Obesidad?

23. ¿Consideras el sobrepeso una enfermedad o una preenfermedad?

24. ¿Consideras la Obesidad como una enfermedad?

25. ¿Consideras la Obesidad una patología del internista?

26. ¿Consideras que el internista debe tener un papel protagonista en el tratamiento de la obesidad?

27. ¿Conoces los fármacos actualmente indicados para el tratamiento de la Obesidad?

28. En caso afirmativo, ¿los has utilizado alguna vez?

29. ¿Conoces las indicaciones de Cirugía Bariátrica?
